# Supplementary material for: CO2 methanation over Ni/SiO2–Al2O3 catalysts: effect of Ba, La, and Ce addition
Source: Royal Society of Chemistry journal article supplement (doi:10.1039/d4ra08895f), 2025-01-01
Supplement: d4ra08895f1.pdf [file d4ra08895f1.pdf]

## **Supplementary Information:**

### **Procedure for CO chemisorption:**

Chemisorption experiments of carbon monoxide were conducted at 40°C utilising AutoChem 2950 Micromeritics apparatus. A 100 mg catalyst sample was introduced into a reactor and reduced with pure hydrogen for 30 minutes at 750 °C. The sample was subsequently cooled to 40°C in a helium flow.

The adsorption of CO was conducted via the pulse chemisorption method with a 10% CO/He gas mixture. The results were computed based on the assumption that the adsorption stoichiometry of CO/Ni is 1:1.

Table S1: TableS1: Textural properties of spent catalysts

| <b>Catalyst (spent)</b> | <b>Surface Area (m<sup>2</sup> g<sup>-1</sup>)</b> | <b>Pore volume (cm<sup>3</sup> g<sup>-1</sup>)</b> | <b>Pore size (nm)</b> |
|-------------------------|----------------------------------------------------|----------------------------------------------------|-----------------------|
| Ni/SA                   | 247                                                | 0.57                                               | 5.68                  |
| Ba-Ni/SA                | 221                                                | 0.53                                               | 5.68                  |
| La-Ni/SA                | 165                                                | 0.44                                               | 7.12                  |
| Ce-Ni/SA                | 212                                                | 0.52                                               | 6.22                  |

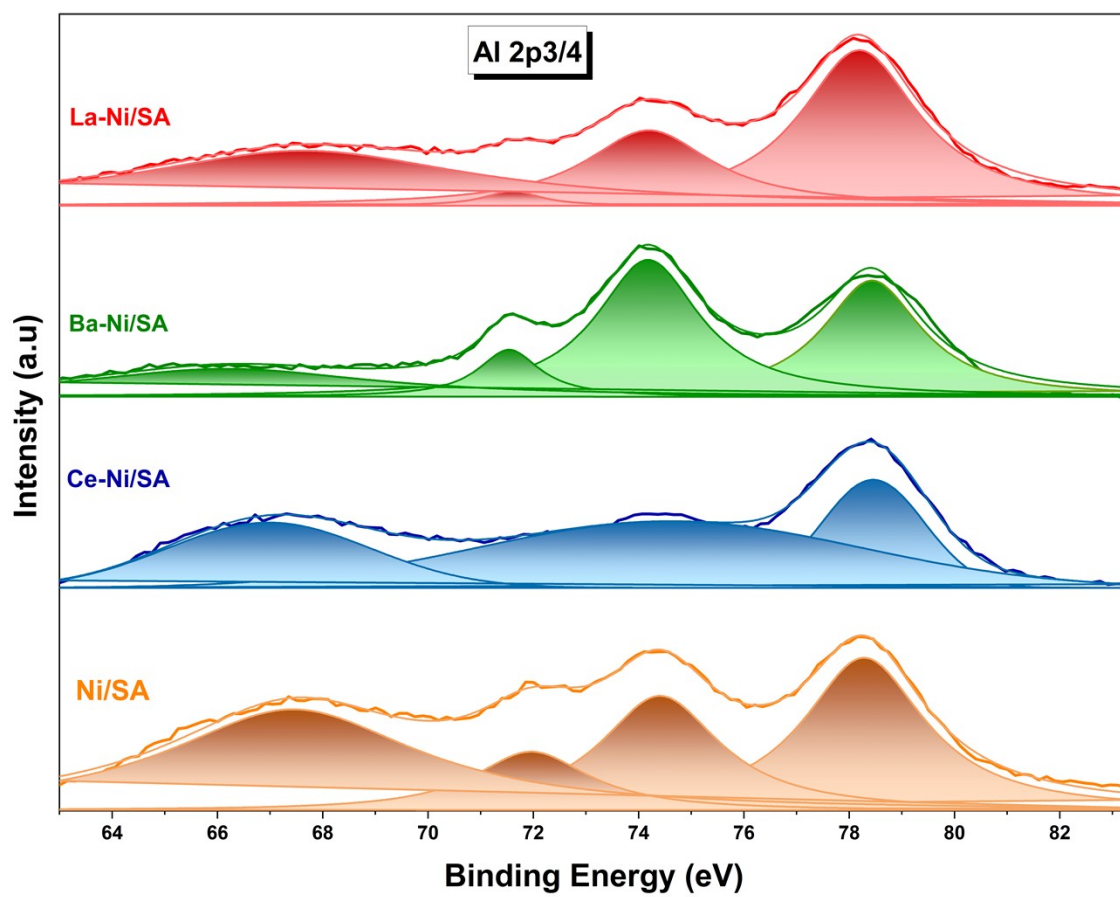

Figure S1: Al 2p XPS spectra of calcined X-Ni/SA catalysts

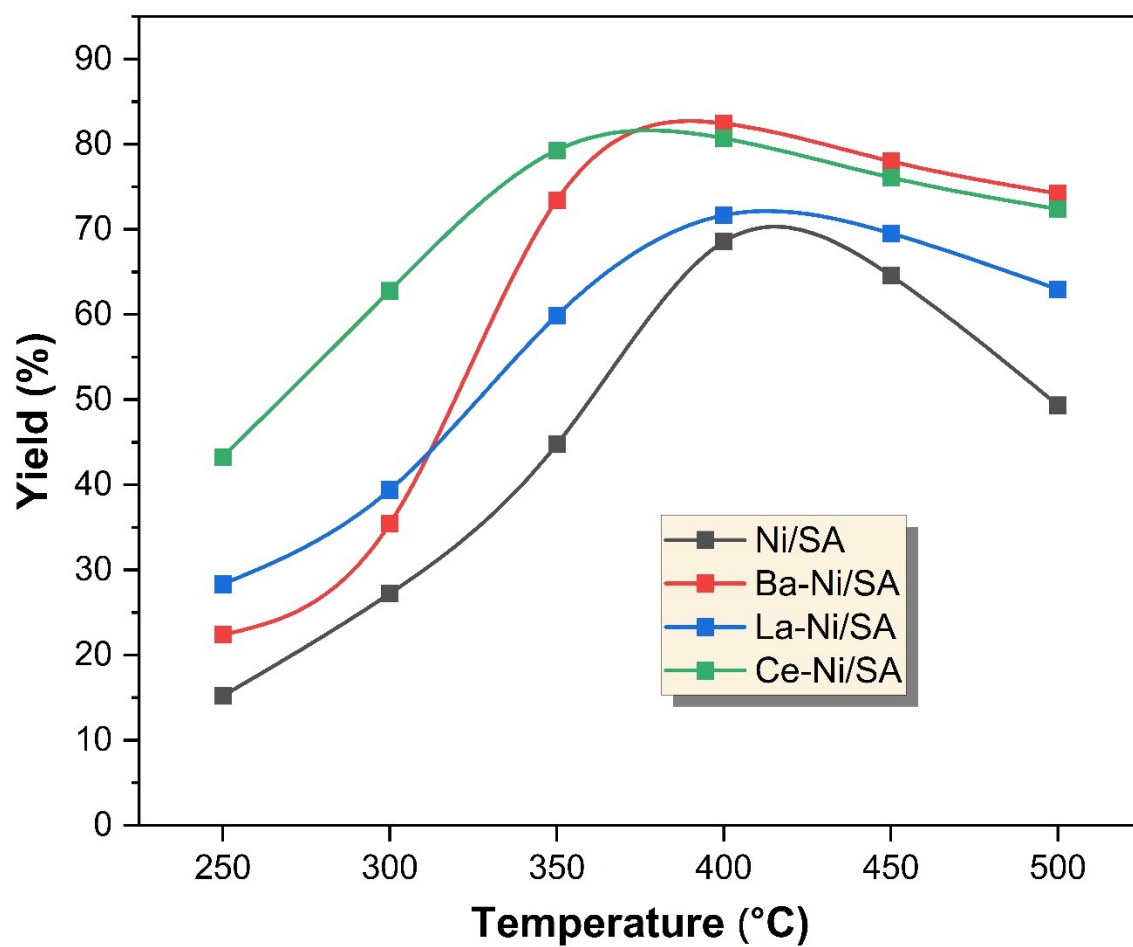

Figure S2: Product yield of X-Ni/SA catalysts; 1 atm, 250-500 °C, 12000 ml/g.h, H<sub>2</sub>:CO<sub>2</sub>=4/1

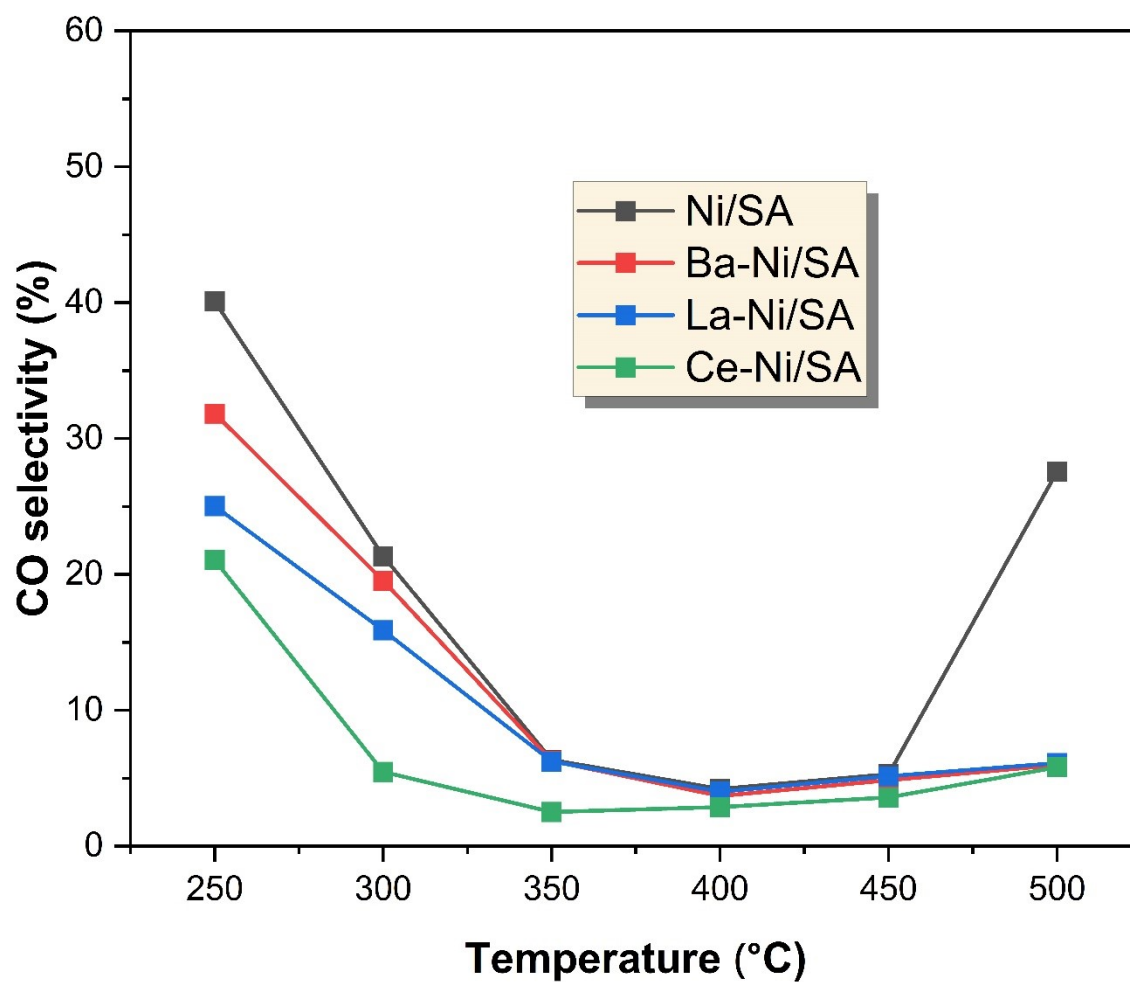

Figure S3: CO selectivity of X-Ni/SA catalysts; 1 atm, 250-500 °C, 12000 ml/g.h, H<sub>2</sub>:CO<sub>2</sub>=4/1

Table S2: FWHM data for calcined sample to calculate crystal size using Scherrer equation

| Sample   | FWHM (rad) |
|----------|------------|
| Ni/SA    | 2.30       |
| Ba-Ni/SA | 1.98       |
| La-Ni/SA | 2.95       |
| Ce-Ni/SA | 2.87       |

(a)

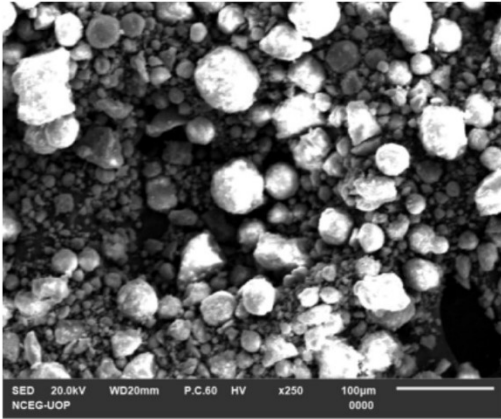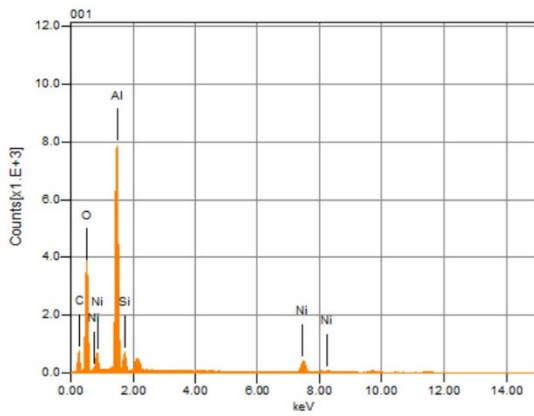

| Formula | mass%  | Atom%  | Sigma | Net    | K ratio   |
|---------|--------|--------|-------|--------|-----------|
| C       | 19.59  | 29.28  | 0.03  | 17581  | 0.0022175 |
| O       | 45.03  | 50.52  | 0.09  | 106947 | 0.0616437 |
| Al      | 24.50  | 16.30  | 0.07  | 291248 | 0.0523885 |
| Si      | 1.73   | 1.10   | 0.02  | 21789  | 0.0037861 |
| Ni      | 9.15   | 2.80   | 0.07  | 29661  | 0.0250920 |
| Total   | 100.00 | 100.00 |       |        |           |

(b)

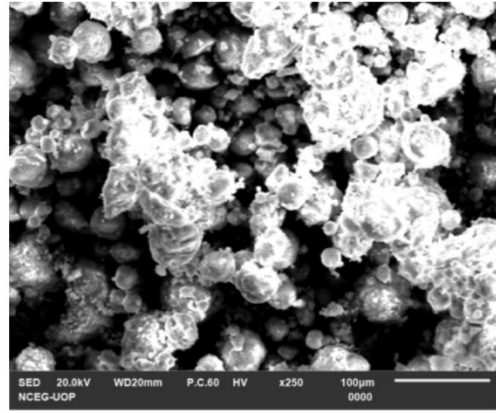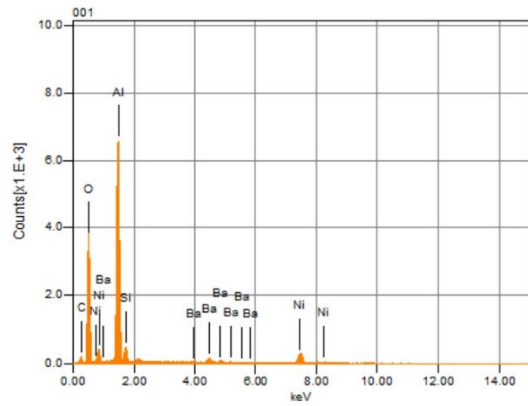

| Formula | mass%  | Atom%  | Sigma | Net    | K ratio   |
|---------|--------|--------|-------|--------|-----------|
| C       | 9.17   | 15.23  | 0.03  | 5169   | 0.0007707 |
| O       | 46.29  | 57.76  | 0.10  | 101651 | 0.0692569 |
| Al      | 29.52  | 21.84  | 0.09  | 243233 | 0.0517161 |
| Si      | 1.98   | 1.41   | 0.03  | 17380  | 0.0035697 |
| Ni      | 9.60   | 3.27   | 0.09  | 22182  | 0.0221811 |
| Ba      | 3.44   | 0.50   | 0.07  | 12063  | 0.0072436 |
| Total   | 100.00 | 100.00 |       |        |           |

(c)

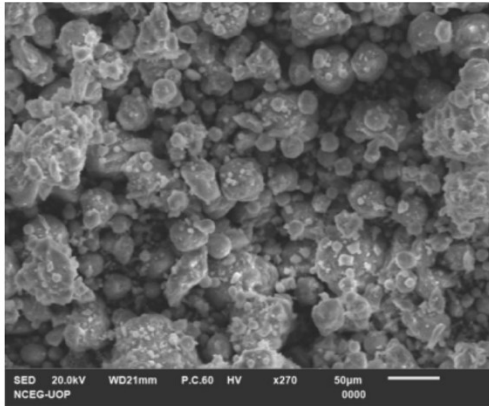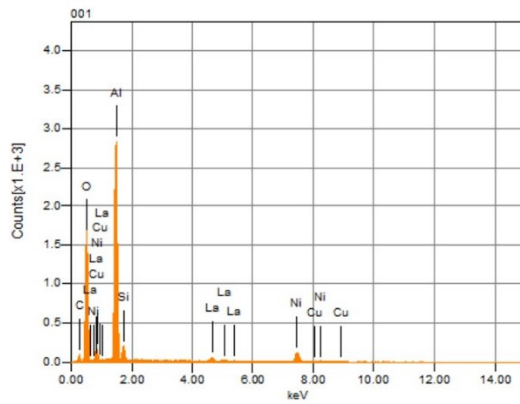

| Formula | mass%  | Atom%  | Sigma | Net    | K ratio   |
|---------|--------|--------|-------|--------|-----------|
| C       | 8.35   | 13.89  | 0.05  | 2028   | 0.0007896 |
| O       | 47.50  | 59.28  | 0.15  | 46270  | 0.0823151 |
| Al      | 29.26  | 21.65  | 0.14  | 103451 | 0.0574329 |
| Si      | 1.99   | 1.41   | 0.04  | 7491   | 0.0040173 |
| Ni      | 8.94   | 3.04   | 0.12  | 8920   | 0.0232904 |
| Cu      | 0.91   | 0.28   | 0.08  | 745    | 0.0022496 |
| La      | 3.05   | 0.44   | 0.10  | 4511   | 0.0072237 |
| Total   | 100.00 | 100.00 |       |        |           |

(d)

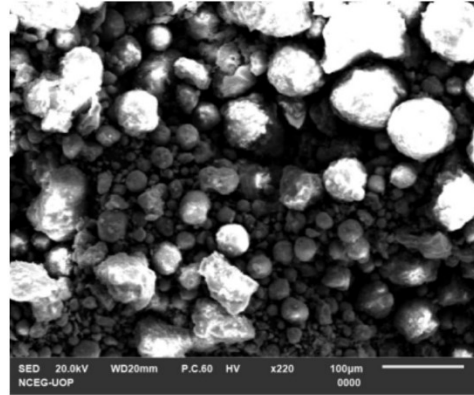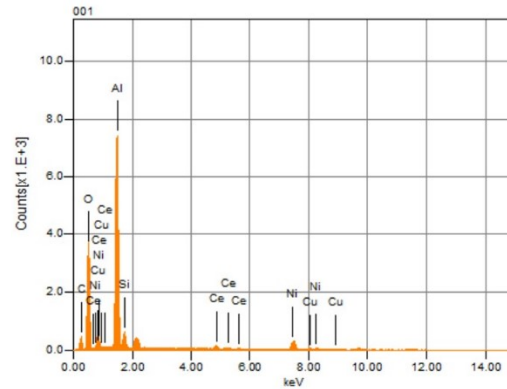

| Formula | mass%  | Atom%  | Sigma | Net    | K ratio   |
|---------|--------|--------|-------|--------|-----------|
| C       | 15.33  | 24.36  | 0.03  | 11768  | 0.0014844 |
| O       | 43.64  | 52.07  | 0.09  | 102546 | 0.0591074 |
| Al      | 26.65  | 18.86  | 0.08  | 276420 | 0.0497212 |
| Si      | 1.85   | 1.26   | 0.03  | 20426  | 0.0035493 |
| Ni      | 8.22   | 2.67   | 0.07  | 23921  | 0.0202365 |
| Cu      | 1.10   | 0.33   | 0.06  | 2639   | 0.0025823 |
| Ce      | 3.21   | 0.44   | 0.06  | 12906  | 0.0072862 |
| Total   | 100.00 | 100.00 |       |        |           |

Figure S4: SEM & EDS of calcined samples (a) Ni/SA (b) Ba-Ni/SA (c) La-Ni/SA (d) Ce-Ni/SA

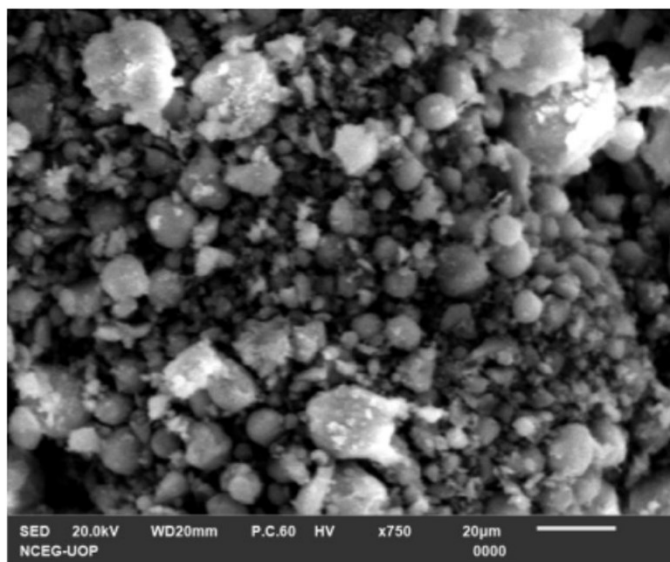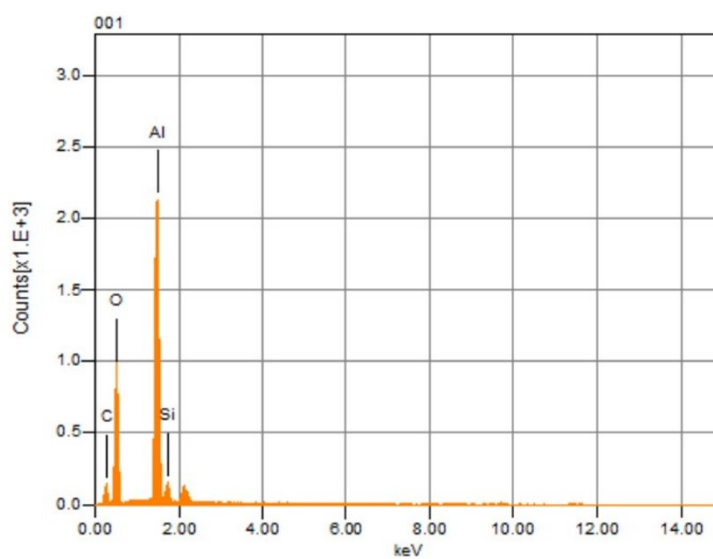

| Formula | mass%  | Atom%  | Sigma | Net   | K ratio   |
|---------|--------|--------|-------|-------|-----------|
| C       | 20.52  | 28.79  | 0.07  | 3838  | 0.0022657 |
| O       | 50.42  | 53.10  | 0.21  | 25709 | 0.0693543 |
| Al      | 27.36  | 17.09  | 0.15  | 78331 | 0.0659434 |
| Si      | 1.71   | 1.02   | 0.05  | 5075  | 0.0041272 |
| Total   | 100.00 | 100.00 |       |       |           |

Figure S5: SEM & EDS of pure SA support

Table S3: CO-pulse chemisorption results

| <b>Catalyst</b> | <b>Metal particle Size<br/>(nm)<sup>a</sup></b> | <b>Active metal area<br/>(m<sup>2</sup>/g)<sup>a</sup></b> |
|-----------------|-------------------------------------------------|------------------------------------------------------------|
| Ni/SA           | 5.7                                             | 3.55                                                       |
| Ba-Ni/SA        | 7.3                                             | 2.77                                                       |
| La-Ni/SA        | 5.4                                             | 3.74                                                       |
| Ce-Ni/SA        | 5.1                                             | 3.98                                                       |

<sup>a</sup> Calculated from CO chemisorption analysis
